# Supplementary material for: Identification of novel tumor suppressor proteases by degradome profiling of colorectal carcinomas
Source: PubMed Central journal article supplement (PMC3875759; doi:10.18632/oncotarget.1303), 2013-09-15
Supplement: oncotarget-04-1919-s001.pdf [file oncotarget-04-1919-s001.pdf]

**Supplementary Table 1. Clinicopathologic features of the discovery series (N=14)**

|                                      | N  | (%) |
|--------------------------------------|----|-----|
| <b>Age (Mean=71; Min=21; Max=91)</b> |    |     |
| <Mean                                | 6  | 43  |
| >Mean                                | 8  | 57  |
| <b>Gender</b>                        |    |     |
| Male                                 | 9  | 64  |
| Female                               | 5  | 36  |
| <b>Tumor Size (Mean=5 cm)</b>        |    |     |
| < Mean                               | 9  | 64  |
| > Mean                               | 5  | 36  |
| <b>Vascular Invasion</b>             |    |     |
| Absent                               | 11 | 79  |
| Present                              | 3  | 21  |
| <b>Perineural Invasion</b>           |    |     |
| Absent                               | 11 | 79  |
| Present                              | 3  | 21  |
| <b>Stage (AJCC/UICC)</b>             |    |     |
| I                                    | 3  | 21  |
| II                                   | 7  | 50  |
| III                                  | 4  | 29  |
| IV                                   | 0  | 0   |
| <b>Histological Differentiation</b>  |    |     |
| Well                                 | 2  | 14  |
| Moderate                             | 11 | 79  |
| Poor                                 | 1  | 7   |
| <b>Tumor Localization</b>            |    |     |
| Ascending Colon                      | 1  | 7   |
| Transverse Colon                     | 1  | 7   |
| Descending Colon                     | 2  | 14  |
| Sigmoid Colon                        | 5  | 36  |
| Cecum                                | 3  | 21  |
| Rectum                               | 2  | 14  |

**Supplementary Table 2. Clinicopathologic features of the validation series (N=28)**

|                                      | N  | (%) |
|--------------------------------------|----|-----|
| <b>Age (Mean=71; Min=54; Max=91)</b> |    |     |
| <Mean                                | 14 | 50  |
| >Mean                                | 14 | 50  |
| <b>Gender</b>                        |    |     |
| Male                                 | 19 | 68  |
| Female                               | 9  | 32  |
| <b>Tumor Size (Mean=5.8 cm)</b>      |    |     |
| < Mean                               | 14 | 50  |
| > Mean                               | 14 | 50  |
| <b>Vascular Invasion</b>             |    |     |
| Absent                               | 21 | 75  |
| Present                              | 7  | 25  |
| <b>Perineural Invasion</b>           |    |     |
| Absent                               | 26 | 93  |
| Present                              | 2  | 7   |
| <b>Stage (AJCC/UICC)</b>             |    |     |
| I                                    | 3  | 11  |
| II                                   | 12 | 43  |
| III                                  | 10 | 35  |
| IV                                   | 3  | 11  |
| <b>Histological Differentiation</b>  |    |     |
| Well                                 | 2  | 7   |
| Moderate                             | 15 | 54  |
| Poor                                 | 11 | 39  |
| <b>Tumor Localization</b>            |    |     |
| Ascending Colon                      | 2  | 7   |
| Transverse Colon                     | 1  | 4   |
| Descending Colon                     | 2  | 7   |
| Sigmoid Colon                        | 8  | 29  |
| Cecum                                | 10 | 35  |
| Rectum                               | 5  | 18  |

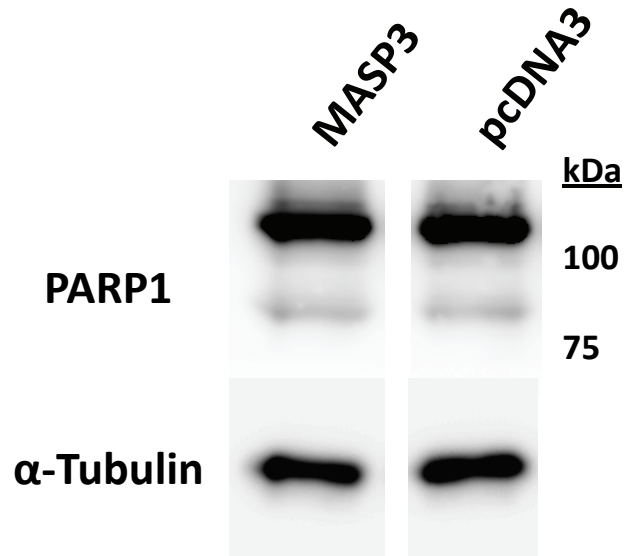

**Supplementary Figure S1. *MASP3* overexpression does not increase apoptosis in HCT116 colon cancer cells.** To assess apoptosis levels in HCT116 cells transfected with *MASP3* or control vector, the large fragment (89 kDa) of PARP1 protein produced by caspase cleavage was analyzed by Western Blot with an anti-PARP antibody (Cell Signaling). An anti- $\alpha$ -Tubulin antibody (Sigma-Aldrich) was used as a loading control.
